# Supplementary material for: a-MoS3@CNT nanowire cathode for rechargeable Mg batteries: a pseudocapacitive approach for efficient Mg-storage
Source: Royal Society of Chemistry journal article supplement (doi:10.1039/c9nr04280f), 2019-01-01
Supplement: c9nr04280f1.pdf [file c9nr04280f1.pdf]

## Electronic Supplementary Information

### ***a*-MoS<sub>3</sub>@CNT nanowire cathode for rechargeable Mg batteries: A pseudocapacitive approach for efficient Mg-storage**

Yujie Zhang,<sup>a</sup> Dong Chen,<sup>a</sup> Xue Li,<sup>a</sup> Jingwei Shen,<sup>a</sup> Zhongxue Chen,<sup>a</sup> Shun-an Cao,<sup>a</sup> Ting Li,<sup>\*b</sup>

Fei Xu<sup>\*a</sup>

<sup>a</sup> Key Laboratory of Hydraulic Machinery Transients, Ministry of Education, School of Power and Mechanical Engineering, Wuhan University, Wuhan 430072, China.

<sup>b</sup> Key Laboratory of Catalysis and Materials Science of the State Ethnic Affairs Commission & Ministry of Education, College of Chemistry and Materials Science, South-Central University for Nationalities, Wuhan 430074, China.

\* E-mail:

Fei Xu (xufei2058@whu.edu.cn)

Ting Li (liting@mail.scuec.edu.cn)

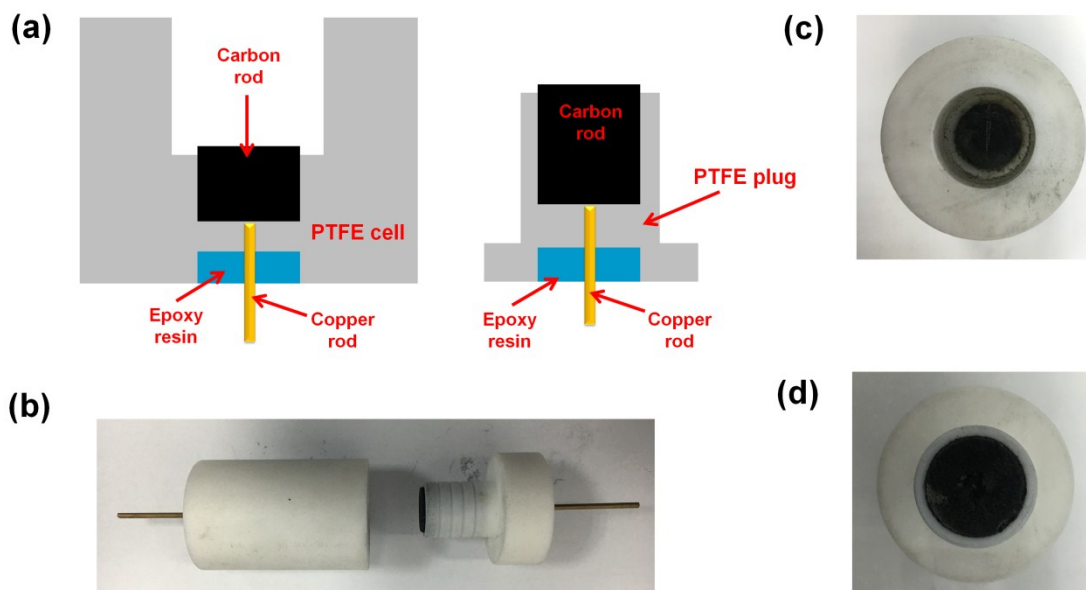

**Fig. S1** (a) Schematic drawing and (b, c, d) photos of the lab-made PTFE cell used for Mg battery tests. The cell is made of customer-designed PTFE cell body and carbon rod electrode (with a copper rod inserted in). Epoxy resin is used to fix the carbon electrode and seal the crack. PTFE tape is used for the sealing during the Mg cell fabrication.

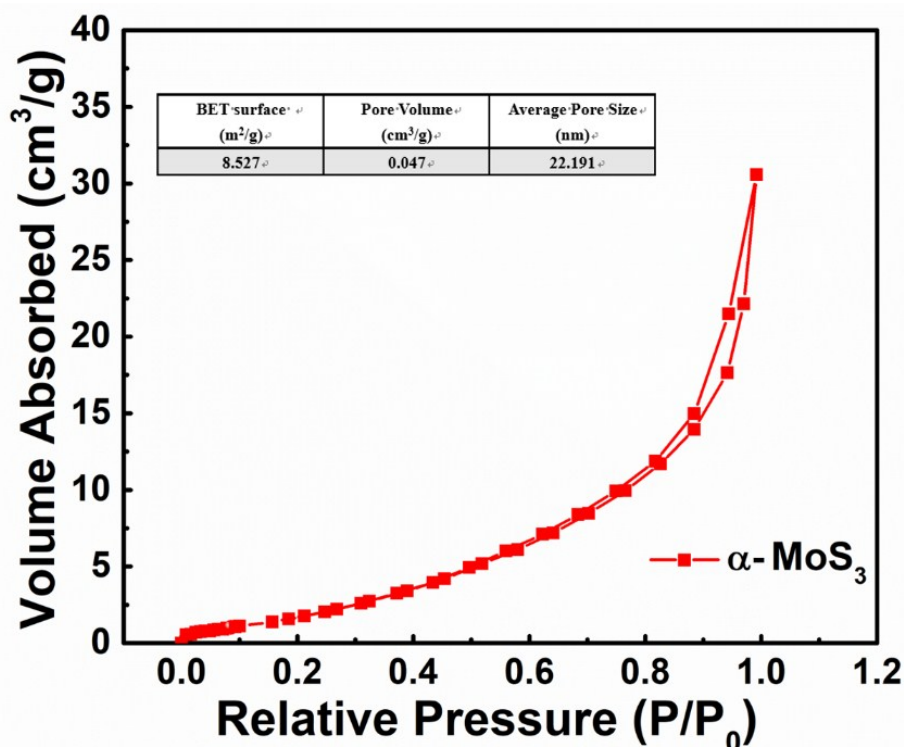

**Fig. S2** N<sub>2</sub> adsorption-desorption isotherms of  $\alpha$ -MoS<sub>3</sub>@CNT and corresponding BET analysis results.

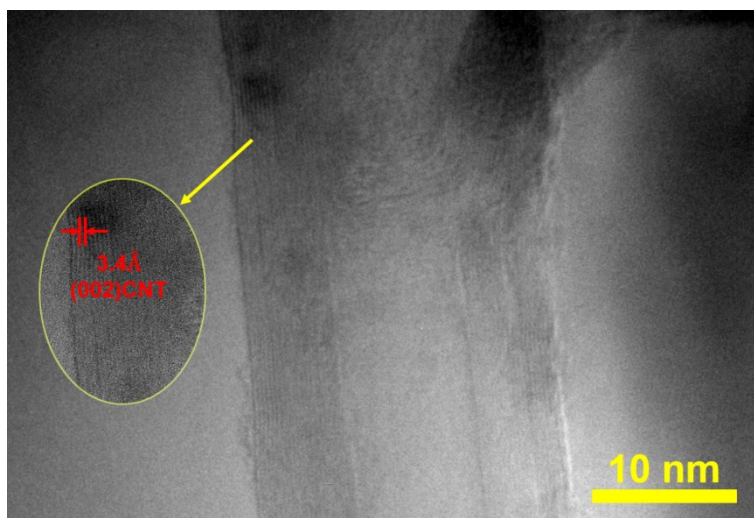

**Fig. S3** TEM image of *a*-MoS<sub>3</sub>@CNT.

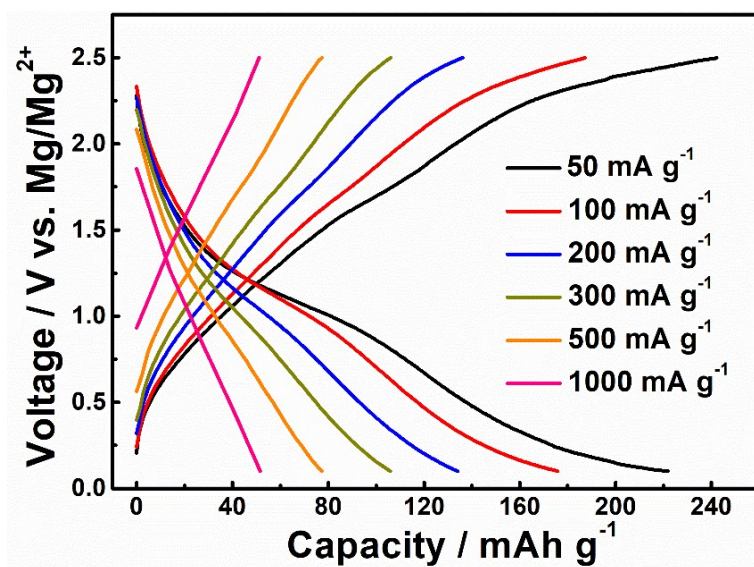

**Fig. S4** Discharge/charge profiles of *a*-MoS<sub>3</sub>@CNT at different current densities from 50 to 1000 mA g<sup>-1</sup>.

**Table. S1** Summary of representative cathode materials electrochemical performance for Mg batteries reported in recent literature.

| Material                                       | Voltage | Capacity                | Rate capability                                                                                             | Cycling stability                      | Ref.      |
|------------------------------------------------|---------|-------------------------|-------------------------------------------------------------------------------------------------------------|----------------------------------------|-----------|
| $\alpha$ -MoS <sub>3</sub> @CNT                | 1.0 V   | 175 mAh g <sup>-1</sup> | 225 (50 mA g <sup>-1</sup> )<br>175 (100)<br>135 (200)<br>105 (300)<br>80 (500)<br>50 (1000)                | 500 cycles,<br>50 mAh g <sup>-1</sup>  | This work |
| Cu <sub>2</sub> Mo <sub>6</sub> S <sub>8</sub> | 1.1 V   | 123 mAh g <sup>-1</sup> | 85 (4 mA g <sup>-1</sup> )<br>78 (8)<br>70 (16)<br>70 (40)<br>50 (80)<br>30 (160)                           | 20 cycles,<br>85 mAh g <sup>-1</sup>   | 1         |
| TiS <sub>2</sub>                               | 0.7 V   | 275 mAh g <sup>-1</sup> | 275 (12 mA g <sup>-1</sup> )<br>250 (23.9)<br>140 (47.8)                                                    | 20 cycles,<br>85 mAh g <sup>-1</sup>   | 2         |
| <i>peo</i> -MoS <sub>2</sub>                   | 0.65 V  | 82 mAh g <sup>-1</sup>  | 70 (5 mA g <sup>-1</sup> )<br>62 (10)<br>55 (25)<br>44 (50)<br>38 (100)                                     | 30 cycles,<br>74 mAh g <sup>-1</sup>   | 3         |
| Ti <sub>2</sub> S <sub>4</sub>                 | 1.2 V   | 200 mAh g <sup>-1</sup> | 200 (12 mA g <sup>-1</sup> )<br>195 (23.9)<br>190 (47.8)                                                    | 40 cycles,<br>140 mAh g <sup>-1</sup>  | 4         |
| Mn <sub>3</sub> O <sub>4</sub>                 | 0.8 V   | 100 mAh g <sup>-1</sup> | 103 (15.4 mA g <sup>-1</sup> )<br>84 (30.8)<br>76 (77)<br>67 (154)<br>58 (308)<br>37.5 (770)<br>22.5 (1540) | 1000 cycles,<br>63 mAh g <sup>-1</sup> | 5         |
| K <sub>x</sub> Mn <sub>8</sub> O <sub>16</sub> | 2.9 V   | 123 mAh g <sup>-1</sup> | 100 (100 mA g <sup>-1</sup> )<br>50 (200)                                                                   | 20 cycles,<br>180 mAh g <sup>-1</sup>  | 6         |

## References

- 1 F. Murgia, P. Antitomaso, L. Stievano, L. Monconduit and R. Berthelot, *J. Solid State Chem.*, 2016, **242**, 151–154.
- 2 X. Sun, P. Bonnicksen and L. F. Nazar, *ACS Energy Lett.*, 2016, **1**, 297–301.
- 3 Y. Liang, H. D. Yoo, Y. Li, J. Shuai, H. A. Calderon, F. C. R. Hernandez, L. C. Grabow and Y. Yao, *Nano Lett.*, 2015, **15**, 2194–2202.
- 4 P. Bonnicksen, X. Sun, K.-C. Lau, C. Liao and L. F. Nazar, *J. Phys. Chem. Lett.*, 2017, **8**, 2253–2257.
- 5 L. Wang, K. Asheim, P. E. Vullum, A. M. Svensson and F. Vullum-Bruer, *Chem. Mater.*, 2016, **28**, 6459–6470.
- 6 J. Huang, A. S. Poyraz, K. J. Takeuchi, E. S. Takeuchi and A. C. Marschillok, *Chem. Commun.*, 2016, **52**, 4088–4091.
